# Supplementary material for: CRISPR/Cas9 mediated T7 RNA polymerase gene knock-in in E. coli BW25113 makes T7 expression system work efficiently
Source: Research Square preprint supplement (doi:10.21203/rs.3.rs-339217/v1), 2021-03-24
Supplement: Supplementary file 1 [file 584d6fbe04fae8e5c489dc45.xlsx]

## Sheet: Sheet1
Table Supplement 2 - Primers For T7 Promoter Variants Library
Primer	Sequences (5'to3')	Base Number	Note
Primer T7-R	atttcctaatgcaggagtcgcata	24	Embellished by 5’-phosphorylation
Primer 5A-F	taatacgactcaAtataggggaattgtgagc	31	Positions that are uppercase are variant parts between original T7 and vairant T7.
Primer 5T-F	taatacgactcaTtataggggaattgtgagc	31
Primer 5G-F	taatacgactcaGtataggggaattgtgagc	31
Primer 6T-F	taatacgactcTctataggggaattgtgagc	31
Primer 6G-F	taatacgactcGctataggggaattgtgagc	31
Primer 6C-F	taatacgactcCctataggggaattgtgagc	31
Primer 7A-F	taatacgactAactataggggaattgtgagc	31
Primer 7T-F	taatacgactTactataggggaattgtgagc	31
Primer 7G-F	taatacgactGactataggggaattgtgagc	31
Primer 8A-F	taatacgacAcactataggggaattgtgagc	31
Primer 8C-F	taatacgacCcactataggggaattgtgagc	31
Primer 8G-F	taatacgacGcactataggggaattgtgagc	31
Primer 9A-F	taatacgaAtcactataggggaattgtgagc	31
Primer 9T-F	taatacgaTtcactataggggaattgtgagc	31
Primer 9G-F	taatacgaGtcactataggggaattgtgagc	31
Primer 10T-F	taatacgTctcactataggggaattgtgagc	31
Primer 10C-F	taatacgCctcactataggggaattgtgagc	31
Primer 10G-F	taatacgGctcactataggggaattgtgagc	31
Primer 11A-F	taatacAactcactataggggaattgtgagc	31
Primer 11T-F	taatacTactcactataggggaattgtgagc	31
Primer 11C-F	taatacCactcactataggggaattgtgagc	31
Primer 12A-F	taataAgactcactataggggaattgtgagc	31
Primer 12T-F	taataTgactcactataggggaattgtgagc	31
Primer 12G-F	taataGgactcactataggggaattgtgagc	31
Primer 13T-F	taatTcgactcactataggggaattgtgagc	31
Primer 13C-F	taatCcgactcactataggggaattgtgagc	31
Primer 13G-F	taatGcgactcactataggggaattgtgagc	31
Primer 14A-F	taaAacgactcactataggggaattgtgagc	31
Primer 14C-F	taaCacgactcactataggggaattgtgagc	31
Primer 14G-F	taaGacgactcactataggggaattgtgagc	31
Primer 15T-F	taTtacgactcactataggggaattgtgagc	31
Primer 15C-F	taCtacgactcactataggggaattgtgagc	31
Primer 15G-F	taGtacgactcactataggggaattgtgagc	31
Primer 16T-F	tTatacgactcactataggggaattgtgagc	31
Primer 16C-F	tCatacgactcactataggggaattgtgagc	31
Primer 16G-F	tGatacgactcactataggggaattgtgagc	31
Primer 17A-F	Aaatacgactcactataggggaattgtgagc	31
Primer 17C-F	Caatacgactcactataggggaattgtgagc	31
Primer 17G-F	Gaatacgactcactataggggaattgtgagc	31
